# Supplementary material
Source: PubMed Central journal article supplement (PMC5768557)
Supplement: mmc1.pdf [file mmc1.pdf]

YMTHE, Volume 25

## **Supplemental Information**

### **Direct Head-to-Head Evaluation of Recombinant Adeno-associated Viral Vectors Manufactured in Human versus Insect Cells**

**Oleksandr Kondratov, Damien Marsic, Sean M. Crosson, Hector R. Mendez-Gomez, Oleksandr Moskalenko, Mario Mietzsch, Regine Heilbronn, Jonathan R. Allison, Kari B. Green, Mavis Agbandje-McKenna, and Sergei Zolotukhin**

**A**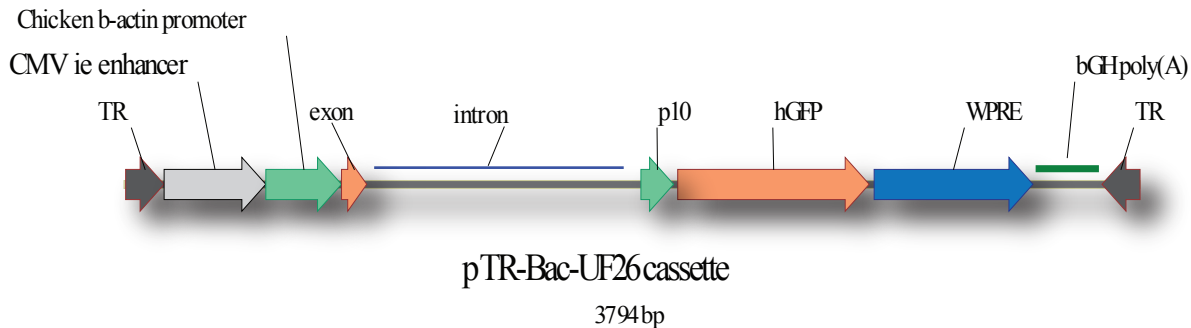**B**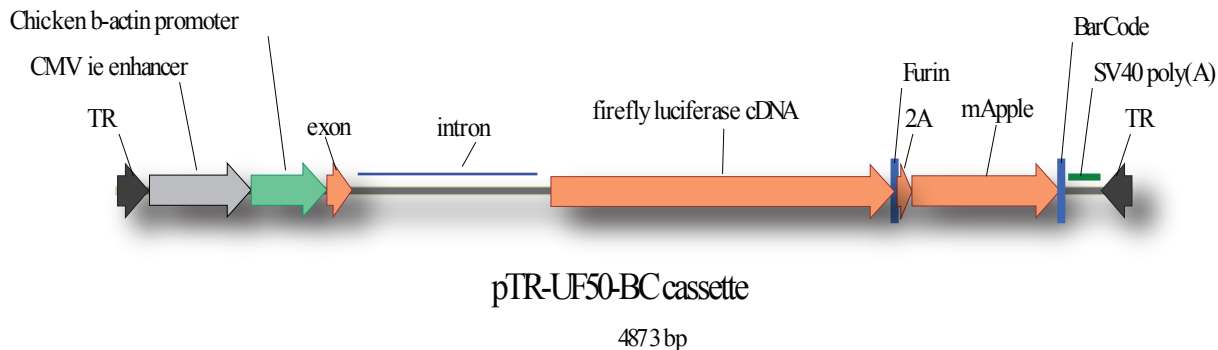

**Figure S1. Annotated graphical maps of rAAV cassettes packaged into rAAV5 and rAAV9 capsids.**  
 (A) pTR-Bac-UF26 cassette. (B) pTR-UF50-BC cassette (to Fig. 4).

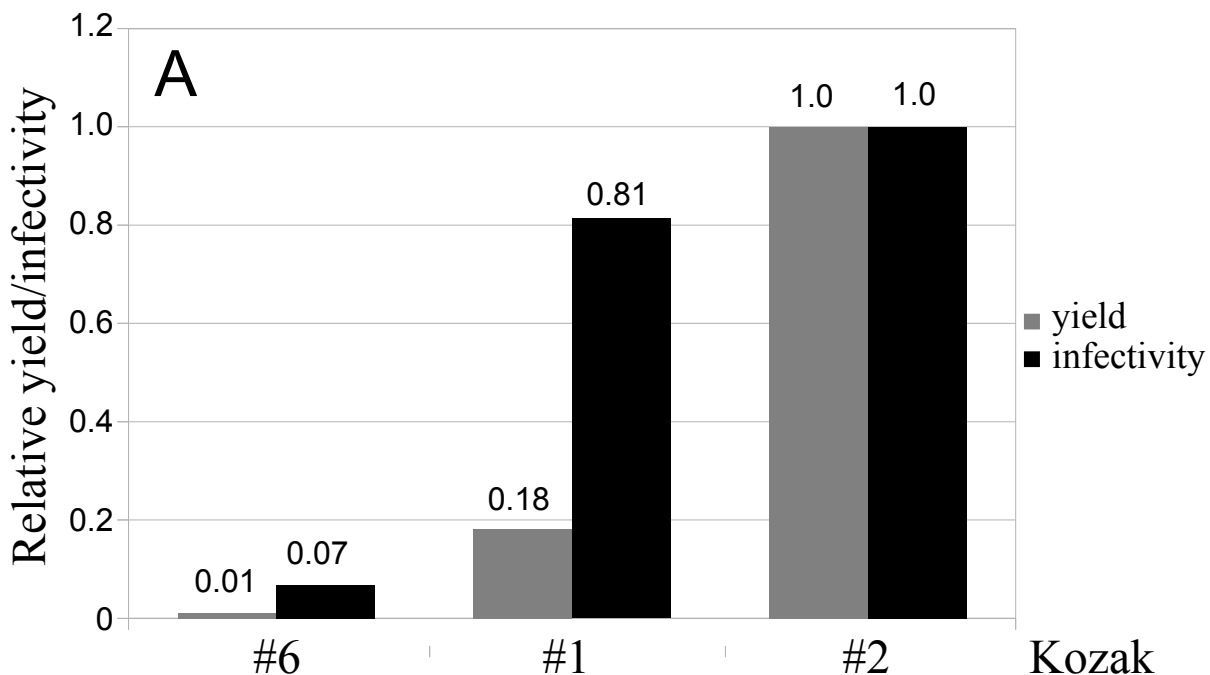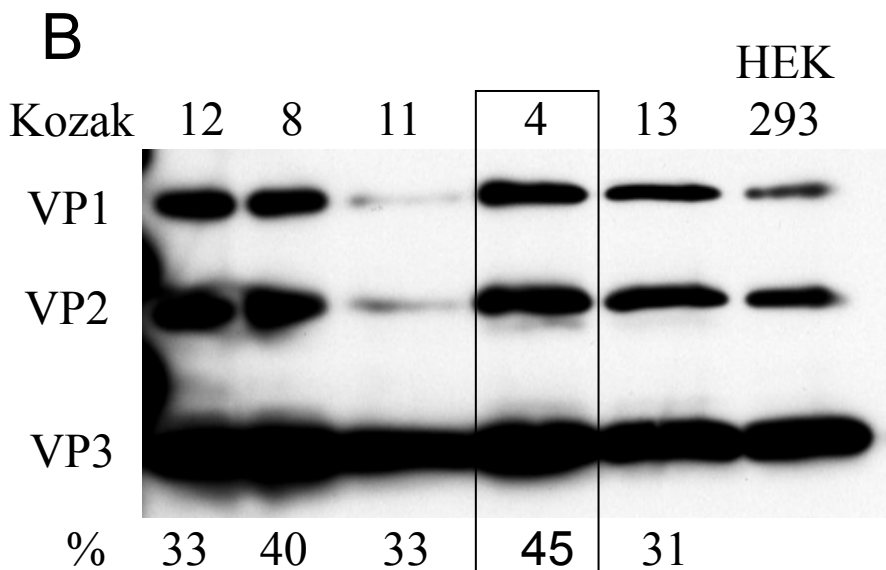

**Figure S2. Characterization of infectivity and capsid composition of selected capsid helper constructs.**

A – Relative yield-to-infectivity ratios of purified rAAV5 produced in Sf9 stable cell lines incorporating Kozak sequences 6, 1, and 2 (to Fig. 1, Table S1).

The selected Kozak 2 produced the highest relative yield-to-infectivity ratio.

B – Capsid composition of purified rAAV9 produced in Sf9 stable cell lines incorporating Kozak sequences (Table S1).

The identical amounts of purified viral particles ( $10 \times 10^{11}$  vg) were loaded in each lane. The selected Kozak 4 (boxed) produced the highest infectivity in vitro among tested.

HEK 293

VP1

\*

VP2

VP3

Sf9 B8

VP1

VP2

VP3

**Figure S3. Scanned profiles of rAAV5 preparations separated by SDS-PAAG electrophoresis.**

Shaded areas indicate areas-under-the-curves (AUCs) outlined for quantifications.

(\*) indicates the peak excluded from the analysis (to Fig. 1 and 2).

A

rAAV5

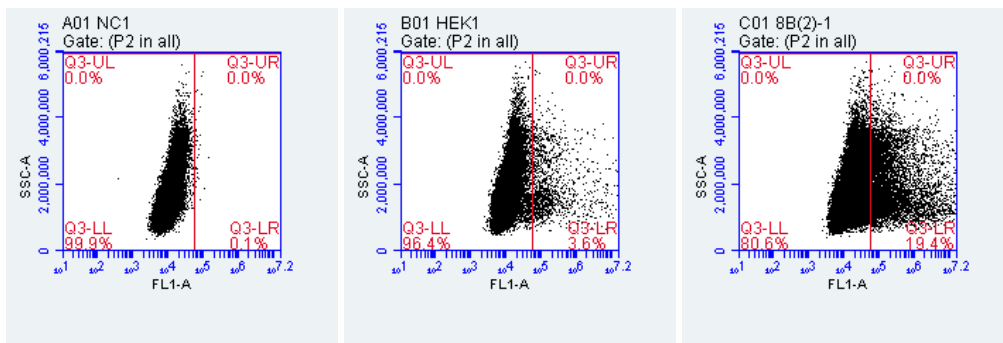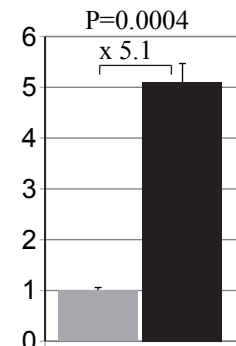

B

rAAV9

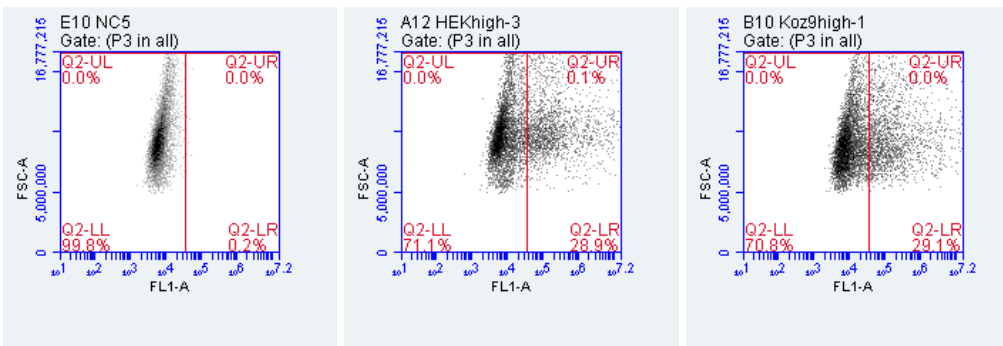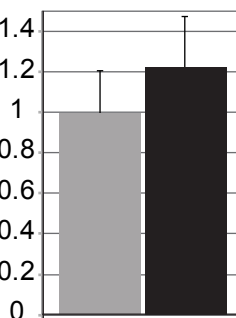

**Figure S4. In vitro transduction assay of rAAV-UF50-BC packaged into rAAV5 or rAAV9 capsids.**

A. Fluorescence-activated cell sorting (FACS) and its graphic quantification of rAAV5-UF50-BC.

B. Fluorescence-activated cell sorting (FACS) and its graphic quantification of rAAV9-UF50-BC

(to Fig. 4).

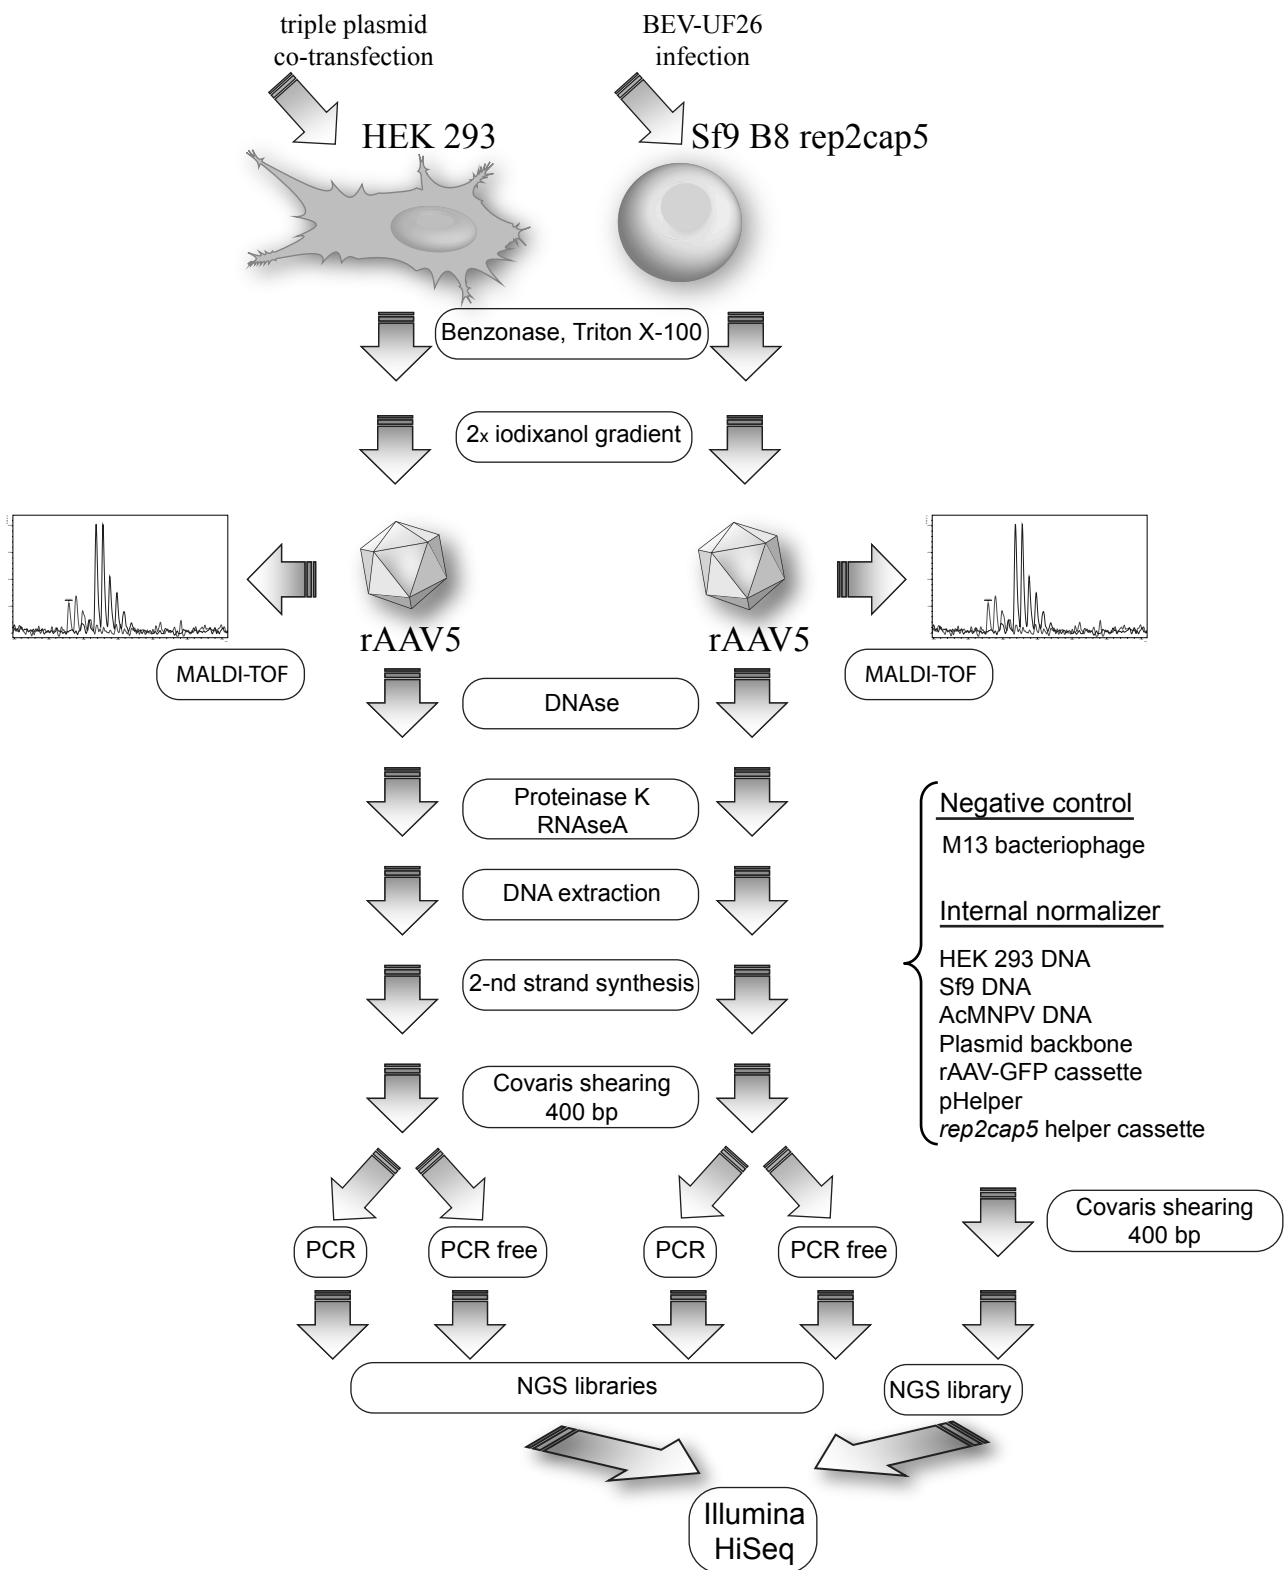

**Figure S5. Schematic flowchart of rAAV5 vector DNA preparation for NGS.**

All steps for HEK 293-derived and Sf9-derived rAAV5 vectors were performed side-by-side (to Table 1).

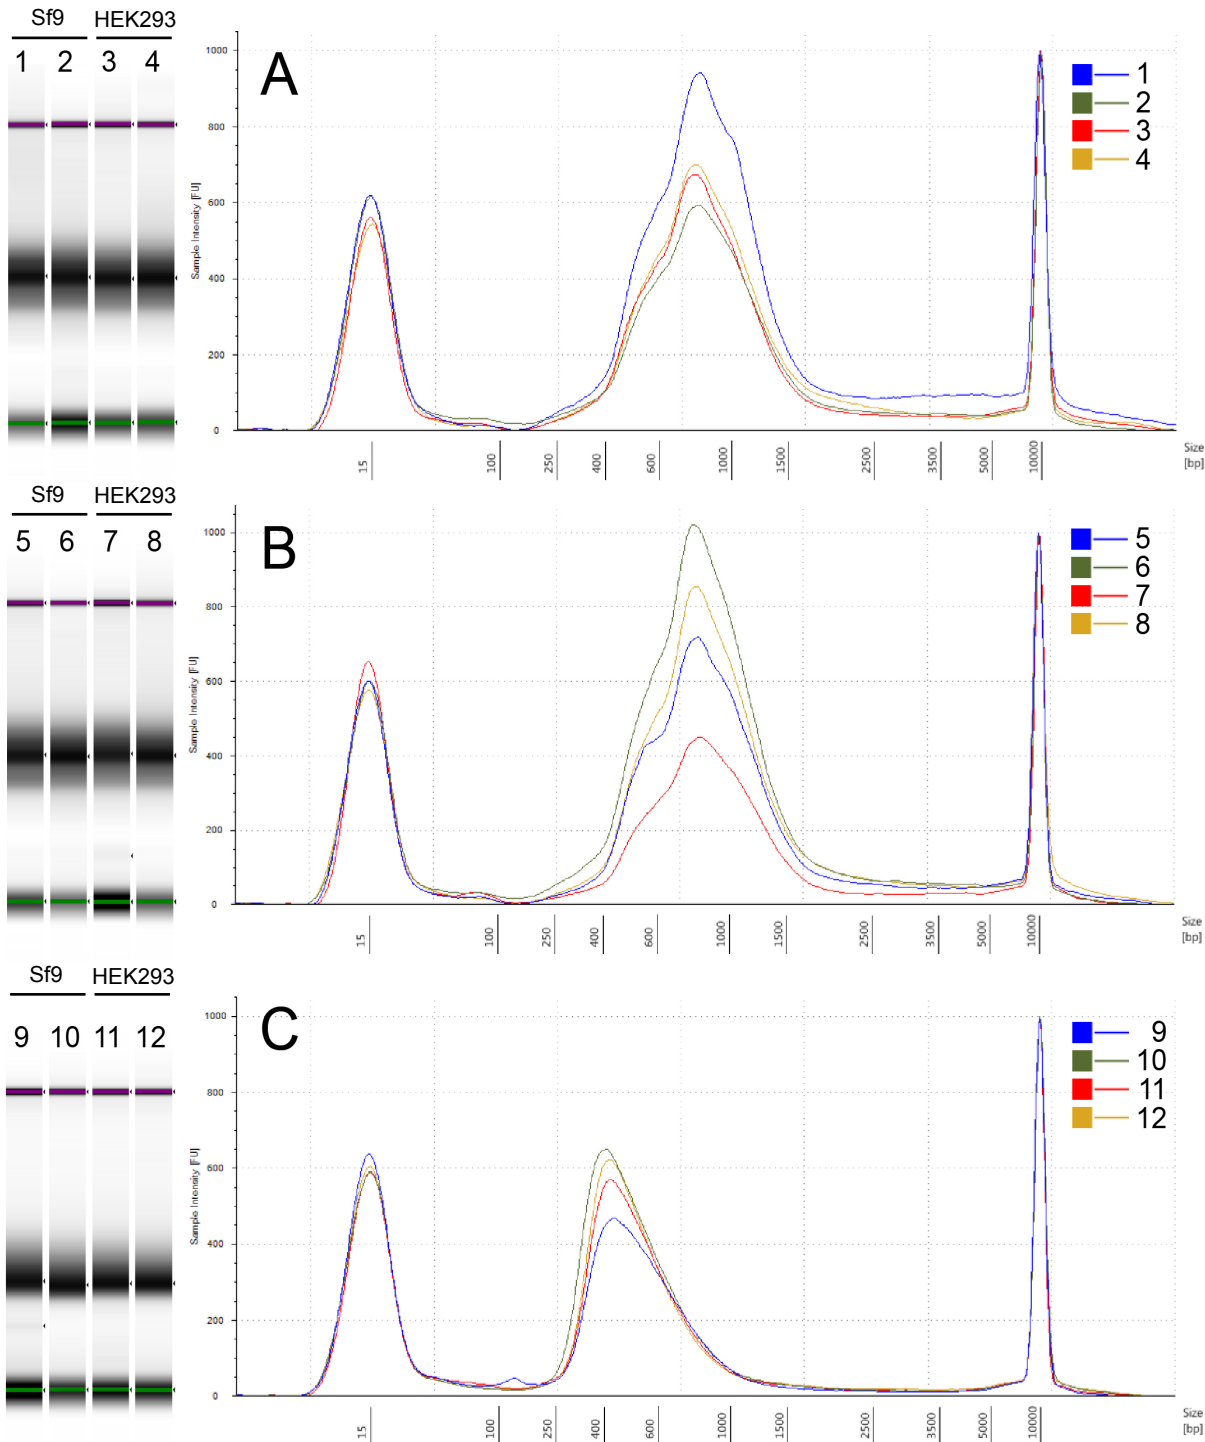

**Figure S6. Distribution of NGS libraries DNA fragment sizes.** Analysis of synthesized NGS libraries by High Sensitive D5000 ScreenTape: A. PCR-free libraries sequenced directly by NGS: 1,2 - rAAV5/Sf9; 3,4 - rAAV5/HEK 293; B. PCR-free libraries used for low cycle PCR enrichment: 5,6 - rAAV5/Sf9, 7,8 - rAAV5/HEK293; C - PCR-enriched libraries: 9, 10 - rAAV5/Sf9; 11, 12 - rAAV5/HEK 293. Libraries 9-12 were sequenced directly by NGS (to Table 1).

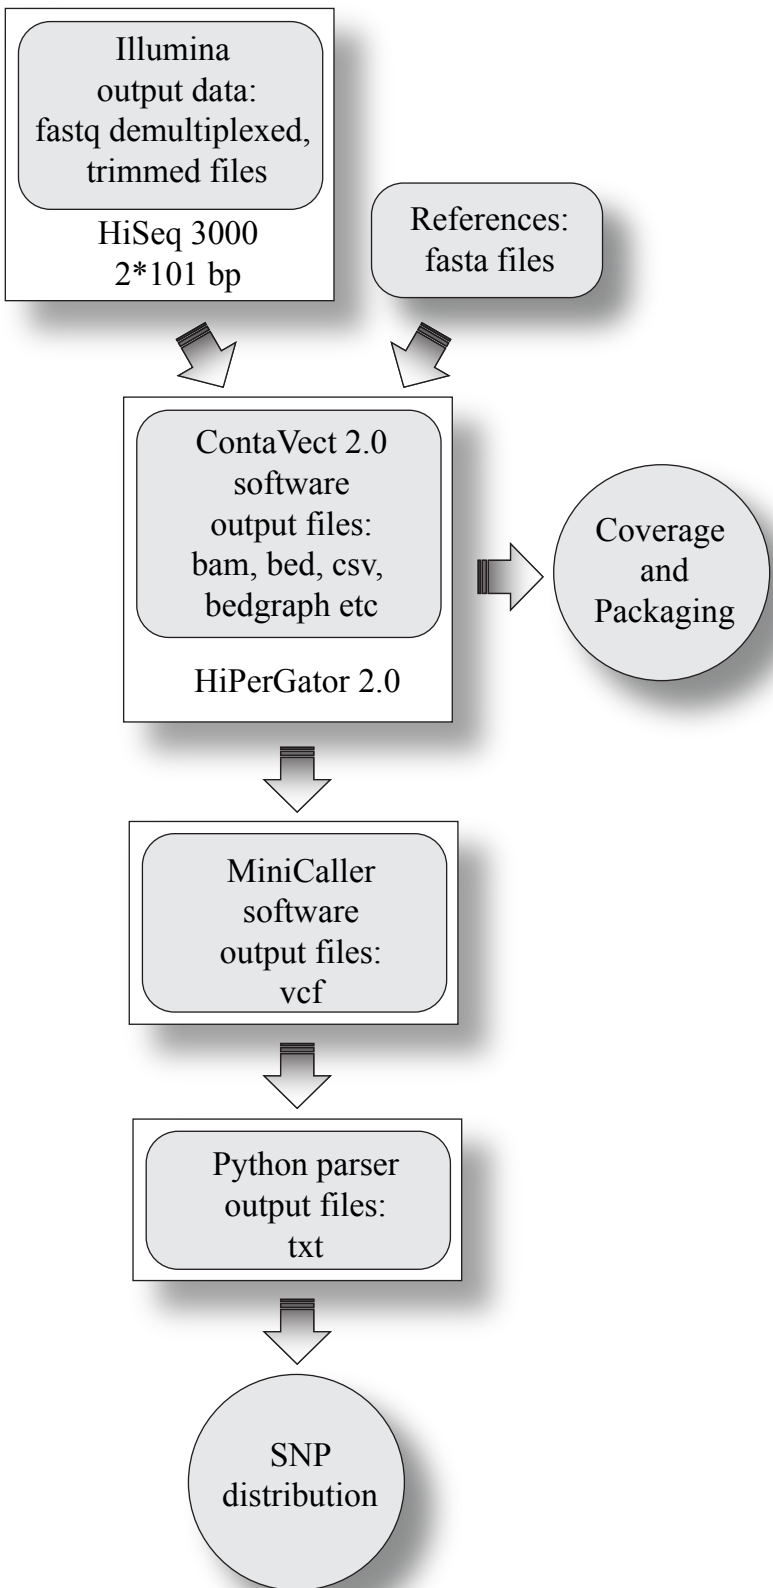

**Figure S7. Schematic flowchart of NGS data processing.**

All calculations were performed on the UF Research Computing HiPerGator supercomputer (to Table 1).



**Table S1.** WT and attenuated TISs tested for the expression of AAV5 and AAV9 capsid genes (to Fig. 1).

|                     | Sequence                  | Efficiency (%)* |
|---------------------|---------------------------|-----------------|
| <b>AAV5 Koz VP1</b> |                           |                 |
| wtAAV5              | GUAGUCA <u>AUGUC</u>      | 91              |
| 1                   | UCUUUU <u>AUGUC</u>       | 43              |
| <b>2</b>            | <b>UGUUUU<u>AUGUC</u></b> | <b>40</b>       |
| 3                   | UAGUUU <u>AUGUC</u>       | 37              |
| 4                   | UAGUGU <u>AUGUC</u>       | 33              |
| 5                   | CAUUGU <u>AUGUC</u>       | 32              |
| 6                   | UCGUUU <u>AUGGA</u>       | 30              |
| 7                   | CAGUUU <u>AUGGU</u>       | 20              |
| 8                   | CAUUGU <u>AUGGU</u>       | 16              |
| 9                   | UAGUGU <u>AUGCU</u>       | 14              |
| 10                  | CAUUGU <u>AUGCU</u>       | 12              |
| <b>AAV9 Koz VP1</b> |                           |                 |
| wtAAV9              | CCAGGU <u>AUGGC</u>       | 130             |
| 1                   | UCUUUU <u>AUGGC</u>       | 57              |
| 2                   | UGUUUU <u>AUGGC</u>       | 54              |
| 3                   | UAGUUU <u>AUGGC</u>       | 50              |
| <b>4</b>            | <b>UAGUGU<u>AUGGC</u></b> | <b>45</b>       |
| 5                   | UCUUUU <u>AUGGG</u>       | 43              |
| 6                   | UCUUUU <u>AUGUC</u>       | 43              |
| 7                   | UGUUUU <u>AUGGG</u>       | 42              |
| 8                   | UGUUUU <u>AUGUC</u>       | 40              |
| 9                   | UAGUUU <u>AUGGG</u>       | 38              |
| 10                  | UAGUUU <u>AUGUC</u>       | 37              |
| 11                  | UAGUGU <u>AUGGG</u>       | 33              |
| 12                  | UAGUGU <u>AUGUC</u>       | 33              |

\*Estimated relative TIS efficiencies<sup>18</sup>.

Selected sequences for each serotype are highlighted in bold. Underline indicates the VP1 start codon.

**Table S2.** VP1/VP3 ions, intensities and ratios (to Fig. 2).

| Ion, M/Z*                   | HEK, VP1/VP3 |       |       |                             | B8, VP1/VP3 |           |          |            |
|-----------------------------|--------------|-------|-------|-----------------------------|-------------|-----------|----------|------------|
|                             | I            | II    | III   | Average                     | I           | II        | III      | Average    |
| <b>1464</b>                 | 0.029        | 0.031 | 0.022 | 0.027                       | 0.101       | 0.13446   | 0.101408 | 0.11228932 |
| <b>1677</b>                 | 0.057        | 0.059 | 0.018 | 0.045                       | 0.1123019   | 0.1475244 | 0.123    | 0.12760876 |
| <b>2051</b>                 | 0.04         | 0.038 | 0.026 | 0.035                       | 0.178       | 0.1548061 | 0.09411  | 0.14230537 |
| <b>Total Average: 0.036</b> |              |       |       | <b>Total Average: 0.127</b> |             |           |          |            |

\* M/Z represents mass divided by charge number.

**Table S3.** VP2/VP3 ions, intensities and ratios (to Fig. 2).

| Ion, M/Z*                   | HEK, VP2/VP3 |          |          |                             | B8, VP2/VP3 |          |          |           |
|-----------------------------|--------------|----------|----------|-----------------------------|-------------|----------|----------|-----------|
|                             | I            | II       | III      | Average                     | I           | II       | III      | Average   |
| <b>1464</b>                 | 0.046521     | 0.045163 | 0.037953 | 0.043                       | 0.177247    | 0.203963 | 0.218152 | 0.1997873 |
| <b>1677</b>                 | 0.045479     | 0.044517 | 0.027105 | 0.039                       | 0.162602    | 0.178148 | 0.150699 | 0.1638163 |
| <b>2051</b>                 | 0.040742     | 0.031026 | 0.031464 | 0.034                       | 0.22123     | 0.137658 | 0.165207 | 0.1746982 |
| <b>Total Average: 0.039</b> |              |          |          | <b>Total Average: 0.179</b> |             |          |          |           |

\* M/Z represents mass divided by charge number.

**Table S4.** Total number of Illumina reads analyzed for rAAV5 produced in HEK 293 cells (to Table 1).

| Sequence reference   | Number of reads |          |               |          |
|----------------------|-----------------|----------|---------------|----------|
|                      | PCR-free*       |          | PCR-enriched* |          |
| UF26 cassette        | 82262561        | 60130733 | 37549520      | 40902323 |
| Backbone             | 2195873         | 1571017  | 1376960       | 1454155  |
| pHelper              | 34612           | 23137    | 16865         | 17829    |
| <i>rep/cap</i>       | 601194          | 425165   | 393207        | 415390   |
| Genomic DNA          | 149013          | 103661   | 88603         | 93199    |
| Unmapped_and LowMapq | 2916120         | 2085563  | 590382        | 640031   |

\* Each referenced sample was prepared, sequenced, and analyzed in duplicates.

**Table S5.** Total number of Illumina reads analyzed for rAAV5 produced in Sf9 cells (to Table 1).

| Sequence reference   | Number of reads |          |               |          |
|----------------------|-----------------|----------|---------------|----------|
|                      | PCR-free*       |          | PCR-enriched* |          |
| UF26 cassette        | 92293074        | 50662242 | 42762178      | 37098393 |
| Backbone             | 274542          | 151788   | 178719        | 154424   |
| <i>rep/cap</i>       | 12983           | 7518     | 1192          | 1081     |
| Baculovirus/Bacmide  | 268990          | 137477   | 170322        | 127495   |
| Genomic DNA          | 23574           | 12677    | 12677         | 15129    |
| Unmapped and LowMapq | 1264002         | 688674   | 446306        | 346939   |

\* Each referenced sample was prepared, sequenced, and analyzed in duplicates.

**Supplemental Video 1. Representative video of visualized gold-labeled AAV particles.**  
For each sample, 30 seconds video was recorded 3 times (to Fig. 3).
